# Supplementary material
Source: PubMed Central journal article supplement (PMC7854799)

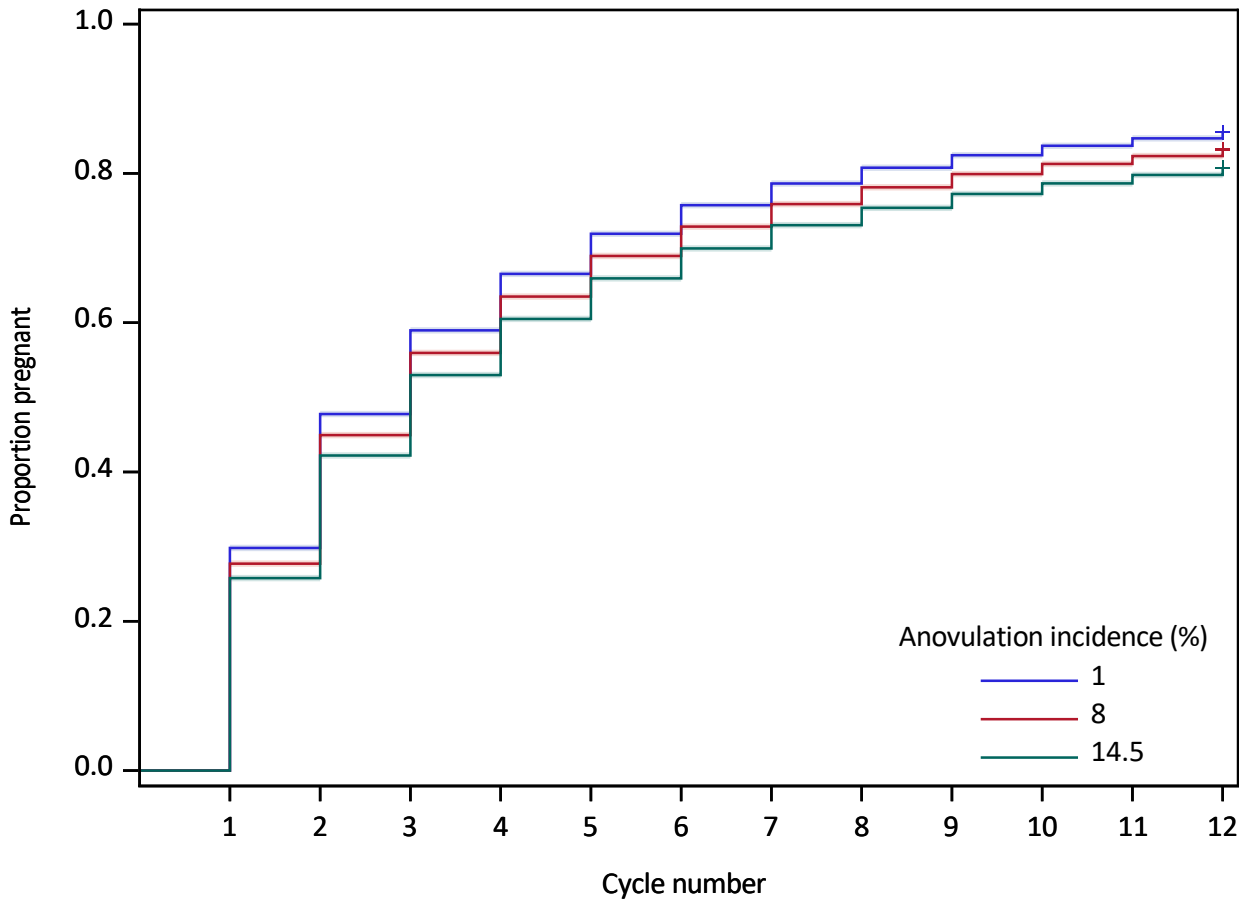

Supplement: NIHMS1603006-supplement-Supp_FigS1.pdf [file NIHMS1603006-supplement-Supp_FigS1.pdf]
